# Supplementary material
Source: PubMed Central journal article supplement (PMC5075526)
Supplement: NIHMS698795-supplement-Supp_FigureS1.pdf [file NIHMS698795-supplement-Supp_FigureS1.pdf]

### Supplemental Figure: Effect of ALT $\geq 0.43$ $\mu\text{kat/L}$ ( $\geq 26$ IU/L) on risk of future diabetes by glucose tolerance status

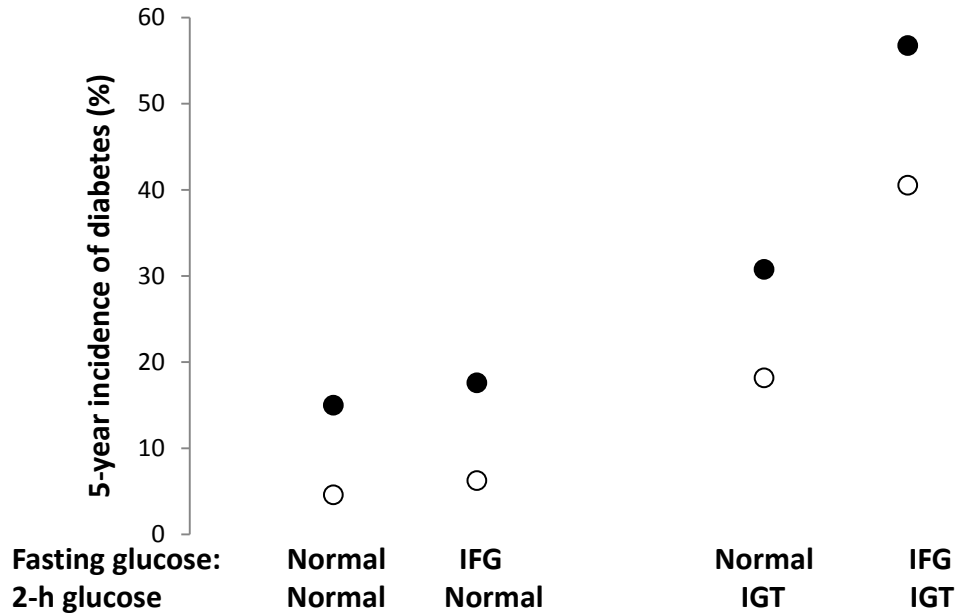

Risk among individuals with ALT  $< 0.43$   $\mu\text{kat/L}$  (white circles) and ALT  $\geq 0.43$   $\mu\text{kat/L}$  (black circles). ALT  $\geq 0.43$   $\mu\text{kat/L}$  was associated with an increased risk (OR 2.46 [95% CI 1.47 - 4.11]) regardless of glucose tolerance status.
